# Supplementary material
Source: publisher site journal article supplement (https://study.sagepub.com/sites/default/files/Appendix%20-%20Weblinks.docx)
Supplement: Supplementary file 1 [file Appendix%20-%20Weblinks.docx]

<http://www.sppe.pt/wp-content/uploads/2015/01/Existential_Therapy_Societies_and_Institutes_List.pdf>
